# Supplementary material
Source: PubMed Central journal article supplement (PMC5441696)
Supplement: pnas.1608254114.sapp.pdf [file pnas.1608254114.sapp.pdf]

## Supporting Methods

**Human Pluripotent Stem Cell Culture.** hPSCs—H7 and H1 hESCs (WiCell, Madison, WI), WTC and WTB iPSCs (generously donated by Bruce Conklin)—were grown to 70% confluence and passaged using Accutase (Accutase, San Diego, CA) to dissociate to single cells (incubated at 37°C for 5 minutes). Dissociated cells were replated on Matrigel-coated cultureware (hESC-qualified for ESCs and growth factor reduced for iPSCs) at a density of 10,000 cells per cm<sup>2</sup> with 10 μM ROCK inhibitor (Y-27632, Selleckchem, Houston, TX) in mTeSR (StemCell Technologies, Vancouver, Canada).

**V2a Interneuron Differentiation.** hPSCs were seeded in mTeSR supplemented with 10 μM ROCK inhibitor and dual SMAD inhibitors 0.2 μM LDN193189 and 10 μM SB431542 (StemGent, Cambridge, MA) at 5,000–100,000 cells/cm<sup>2</sup> onto 24-well plates coated with Matrigel. On day 3, medium was changed to mTeSR supplemented with dual SMAD inhibitors only. On day 5, the base medium was switched to neural induction medium (DMEM F:12 (Corning, Corning, NY), N2 supplement (Life Technologies, Carlsbad, CA), L-Glutamine (VWR), 2 μg/ml heparin (Sigma Aldrich, St. Louis, MO), non-essential amino acids (Mediatech INC, Manassas, VA), penicillin-streptomycin (VWR) supplemented with fresh 0.4 μg/ml ascorbic acid (Sigma Aldrich) and 10 ng/ml brain derived neurotrophin factor (BDNF, R&D Systems, Minneapolis, MN)) supplemented with dual SMAD inhibitors and 10 nM–10 μM retinoic acid (Sigma Aldrich). On day 7, dual SMAD inhibition was ceased and 10 nM–10 μM retinoic acid, 10 nM–10 μM pur (EMD Millipore, Darmstadt, Germany) and 100 nM–10 μM N-[N-(3,5-difluorophenacetyl)-L-alanyl]-S-phenylglycine t-butyl ester (DAPT) were added to the neural induction medium. Medium was changed every 2–3 days throughout the differentiation, with fresh supplements added each time for up to 17 days.

**Neuronal Maturation.** On day 17 of differentiation, cultures were dissociated with Accutase (45 minutes at 37°C; triturated every 15 minutes) and plated at 100,000 cells/cm<sup>2</sup> on Matrigel-coated  $\mu$ -slide 8 wells (ibidi, Martinsreid, Germany) or glass coverslips (Warner Instruments, Hamden CT) in neural induction medium containing 100 nM RA, 100 nM pur, and 1  $\mu$ M DAPT plus 10  $\mu$ M ROCK inhibitor. Three days later, the medium was switched to neural maturation medium (BrainPhys plus SM1 supplement (Stemcell Technologies (1)) supplemented with 10 ng/ml of BDNF, GDNF, CNTF, and IGF, R&D Systems). Medium was completely changed every 3–4 days for the remainder of the culture duration.

**Real Time Quantitative Polymerase Chain Reaction.** Samples were lysed and RNA was extracted using the E.Z.N.A. Total RNA Kit (Omega Biotek, Norcross, GA). RNA (500 ng) was reverse-transcribed into cDNA using the iScript cDNA synthesis kit (BioRad, Hercules, CA). RT-qPCR was performed using Fast SYBR Green Master Mix (Life Technologies) and the primers listed in Table S2 were annealed at 61°C on the Step One Plus Real-Time PCR System (Life Technologies). Fold-changes were calculated using the  $\Delta\Delta C_t$  method (2). For high-throughput gene expression analysis, Fluidigm was used. Preamplified cDNA samples and primers were mixed with Sso Fast EvaGreen Supermix (BioRad) then loaded onto a 96.96 Dynamic Array integrated fluidic circuit (IFC) and ran on a BioMark HD system.

**Flow Cytometry.** At day 17 of differentiation, cells were completely dissociated using Accutase and stained with the Transcription Factor Buffer Set, which includes a fixation/permeabilization (FP) and wash/permeabilization (WP) buffer (BD Biosciences, Franklin Lakes, NJ). Dissociated samples were first fixed for 45 minutes at 4°C in the FP buffer followed by a 20 minute block with WP buffer containing 5% normal donkey serum (NDS, Jackson Laboratory, Bay Harbor, ME). Primary antibodies against CHX10 and the proper matching species isotype control were added at the concentration shown in Table S3 into WP

buffer containing 2% NDS and incubated at 4°C for 45 minutes. After two washes with WP buffer, secondary antibodies donkey anti-mouse IgG, Alexa Fluor 488 (Life Technologies), at a dilution of 1:200, were added to WP buffer and incubated at 4°C for 45 minutes. After two washes with WP buffer, samples were passed through a 35- $\mu$ m filter before assessing with a BD Accuri C6 (BD) cytometer (minimum 20,000 events). Cytometry analysis was performed using FlowJo V10 (Flowjo, Ashland, OR).

***In Vitro* Immunocytochemistry and Imaging.** Samples were fixed using 4% paraformaldehyde (VWR) for 30 minutes and permeabilized using 0.1% Triton-X in PBS for 15 minutes at 4° C before blocking for 1 hour at 4°C with PBS containing 5% NDS. Primary antibodies (Table S3) were diluted in PBS containing 2% NDS and incubated overnight. Samples were washed three times with PBS for 15 minutes at room temperature before incubating with secondary antibodies (Life Technologies) diluted in PBS containing 2% NDS. Hoechst was added to the samples for 10 minutes then washed and imaged using a Zeiss Axio Observer inverted wide-field microscope equipped with an Apotome structured light attachment. An average intensity projection was performed on Z-stack images to create a single two-dimensional image spanning the entire thickness of the observed field. Images were processed using Photoshop.

**Single Cell RNAseq.** At Day 17 of culture, cells were dissociated with Accutase. Approximately 8,000 cells were prepared for single cell analysis through droplet encapsulation by the Chromium Controller and library preparation with the Chromium Single Cell 3' v1 Library and Gel Bead Kit (10x Genomics, San Francisco, CA). cDNA was sheared using a Covaris S2 sonicator and 12 PCR cycles were run during cDNA amplification. Libraries were sequenced on a NextSeq 500 (Illumina, San Diego, CA). Sequences were demultiplexed and aligned to human reference genome hg19 using the default settings of 10xGenomics *Cellranger* v 1.2. Genes were annotated using Ensembl version 70 (3). After *Cellranger* filtering, >85

million valid reads remained with >70% mapping to the transcriptome. Downstream analysis was performed using *Seurat* (4, 5) and cells not expressing between 500 and 5000 unique genes were removed. A subset of high-variance genes was determined using *Seurat*'s "MeanVarPlot" function (expression cutoff of  $\geq 0.25$ ; dispersion cutoff of  $\geq 0.50$ ) and used to group cells into clusters (principal components 1–12; cluster resolution parameter = 0.5) (6). The top 20 differentially expressed genes for each cluster were plotted in the heatmap. Raw data is available at SRA under the accession number GSE97564. Gene Ontology analysis was performed on statistically significant differentially expressed genes ( $p \leq 0.05$ ) using PANTHER (7, 8) and GOrilla (9, 10).

**Calcium Imaging and Analysis.** Cultures were washed with PBS and the medium was replaced with Neurobasal plus Fluo4 AM (10  $\mu$ M, Life Technologies) for 30 minutes at 37° C. The cultures were then washed with fresh Neurobasal and allowed to recover for an additional 30 minutes at 37°C before recording on a Zeiss Axio Observer. To analyze wide field calcium videos, soma were identified from phase images and selected as regions of interest (ROI) in the corresponding fluorescent green channel. To assess calcium fluctuations, mean fluorescence intensity for each ROI was measured over time at a sampling rate of 2.38 frames per second using MATLAB (MathWorks, Natick, MA) to assess calcium fluctuations within the ROIs. To minimize noise, the median of all the traces was calculated and subtracted from each. A minimum of 20 ROIs were examined for each field of view.

**Electrophysiological Testing.** Neurons (days 27, 41, 63) were recorded in the whole-cell configuration using glass pipette electrodes filled with the internal solution ((mM): 100 K-gluconate, 20 KCl, 10 HEPES, 4 Mg-ATP, 0.3 Na-GTP, 10 Na-phosphocreatine, and 0.2% biocytin; osmolality 300 mOsm), while being perfused with warm artificial cerebrospinal fluid ((mM): 126 NaCl, 26 NaHCO<sub>3</sub>, 3.0 KCl, 1.25 NaH<sub>2</sub>PO<sub>4</sub>, 2.0 CaCl<sub>2</sub>, 2

MgCl<sub>2</sub>, and 20 dextrose; osmolality 320 mOsm, T = 33°C; bubbled with 95% O<sub>2</sub> + 5% CO<sub>2</sub> mixture, pH = 7.3–7.35). Resting membrane potential was measured immediately after achieving the whole-cell configuration. Action potentials were elicited by injecting a 1.5s long depolarizing current of 20pA and measuring the voltage response in current clamp (baseline voltage was held between -60 and -70 mV by injecting a small, constant, negative current). Action potentials were analyzed using custom-written software in IgorPro (Wavemetrics, Portland, OR).

**Spinal Transplantation.** All animal studies were performed in accordance with the Institutional Animal Care and Use Committee at the University of California, San Francisco. Day 17 cultures were dissociated for 45 minutes using Accutase, washed with PBS, resuspended in ice-cold DMEM at  $\sim 5 \times 10^5$  cells/ $\mu$ L, and maintained on ice until transplantation. Female C57Bl/6j SCID mice age 12 weeks were anesthetized using isoflurane and a dorsal laminectomy was performed at T9 to expose the spinal cord. The vertebral column was stabilized, and the dissociated cells were injected at four sites bilaterally in the ventral horns of the spinal cord at the rostral and caudal edges of the laminectomy site ( $\sim 1.25 \times 10^5$  cells/site). The musculature over the exposed spinal cord was sutured closed and the skin was closed with surgical clips. Antibiotics (enrofloxacin) were delivered daily (I.P., 2.5 mg/kg) for 10 days. After 2 weeks, animals were euthanized and transcardially perfused with PBS followed by 4% paraformaldehyde. A 2-cm segment of spinal cord tissue centered over the transplantation site was harvested and post-fixed overnight in 4% paraformaldehyde.

**Murine Tissue Processing and Immunofluorescence.** Spinal cords were embedded and 20  $\mu$ m sections were obtained in the sagittal plane. Sections were permeabilized with 0.3% Triton-X in PBS for 15 minutes or ice-cold acetone for 10 minutes. All sections were then blocked with 10% NDS, 5% bovine

serum albumin, and 0.1% Triton-X in PBS. Sections were incubated with primary antibodies found in Table S3. Sections were washed three times and incubated with the appropriate secondary antibodies (1:500) in blocking solution for 1 hour, then mounted with coverslips using Prolong Gold Antifade containing DAPI. Z-stack images (1  $\mu\text{m}$  step size) were acquired using a Zeiss Axio Observer inverted wide-field microscope and an Apotome structured light attachment. For high resolution imaging of synaptic markers, Z-stack images were acquired using a Zeiss LSM 880 confocal microscope with Airyscan. Maximum intensity projection was performed on Z-stack images to create a single two-dimensional image spanning the entire thickness of the section.

**Image Quantification.** Quantification of *in vitro* maturation images was performed by rendering a 3D surface to define the regions positive for NF and  $\beta_{III}$  tubulin using Imaris 8.4 (Bitplane, Belfast, United Kingdom). Data was normalized by observed field area. For CHX10 counts, ImarisColoc was used to identify overlap of CHX10<sup>+</sup> cells with Hoechst<sup>+</sup> cells. A 3D surface to define the regions of overlap was created to quantify the number of CHX10<sup>+</sup>Hoechst<sup>+</sup> cells as well as total Hoechst<sup>+</sup> cells. Quantification of transplanted V2a interneuron populations was performed by manual counting of 10 evenly spaced sagittal sections spanning the width of the spinal cord in Image J using the Cell Counter plugin.

**Statistical Analysis.** Statistical analysis was performed using Prism 6 software. The mean and  $\pm$  standard deviation were calculated for a minimum of three biological replicates for all data unless otherwise noted. Unpaired t-tests were performed when comparing two groups. One-way analysis of variance (ANOVA) followed by appropriate post hoc pairwise comparisons Tukey's tests were used when three or more groups were specified. Specific statistical analysis is mentioned within the corresponding figure legend.

Variances were confirmed to not differ significantly with the Brown-Forsythe test. In all comparisons, significance was defined as  $p \leq 0.05$  (denoted as \*).

Figure S1

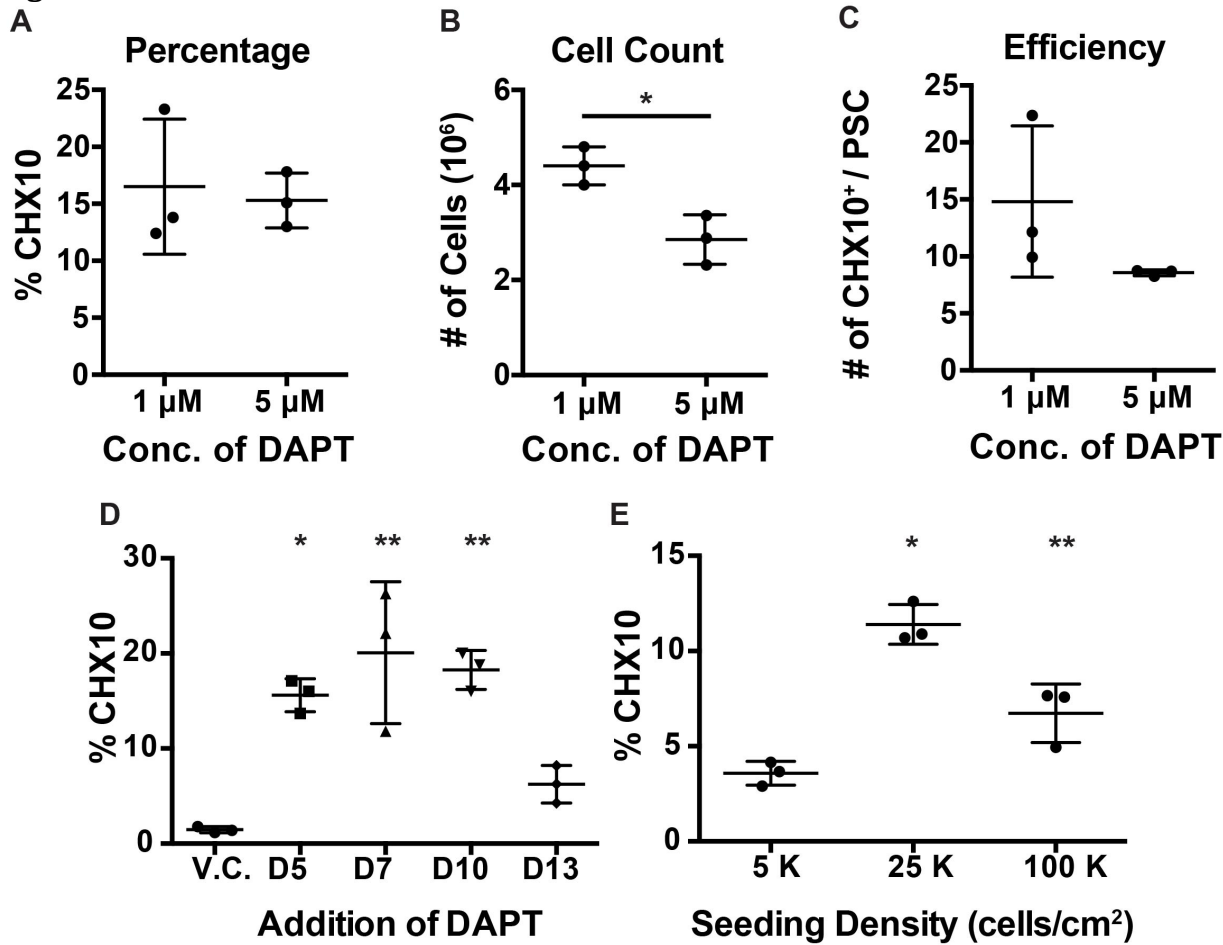

**Fig. S1: DAPT concentration affects V2a interneuron yield.** (A) Flow cytometry analysis of CHX10 expression at Day 17 with 1  $\mu$ M and 5  $\mu$ M of DAPT. (B) Total number of cells per 24-well culture at day 17 of V2a interneuron differentiation with 1  $\mu$ M and 5  $\mu$ M DAPT (using 100 nM RA and 100 nM pur) is significantly different ( $p < 0.05$ , unpaired t-test). (C) Total number of CHX10<sup>+</sup> cells at day 17 per input pluripotent stem cell. (D) Flow cytometry analysis of CHX10 at day 17 when DAPT was added on day 5, day 7, day 10, day 13, or vehicle control (V.C., DMSO). CHX10 expression adding DAPT on day 5 was significantly different (\* =  $p < 0.05$ , one-way ANOVA and Tukey post hoc comparison) than V.C. CHX10 expression adding DAPT on day 7 and day 10 was significantly different (\*\* =  $p < 0.05$ , one-way ANOVA and Tukey post hoc comparison) than V.C. and day 13. (E) Flow cytometry analysis of CHX10 at day 17 using three different initial seeding densities. CHX10 expression at a seeding density of 25k was significantly different (\* =  $p < 0.05$ , one-way ANOVA and Tukey post hoc comparison) compared to 5k and 100k. CHX10 expression at a seeding density of 100k was significantly different (\*\* =  $p < 0.05$ , one-way ANOVA and Tukey post hoc comparison) compared to 5k. Data represented as mean  $\pm$  standard deviation.



Figure S2

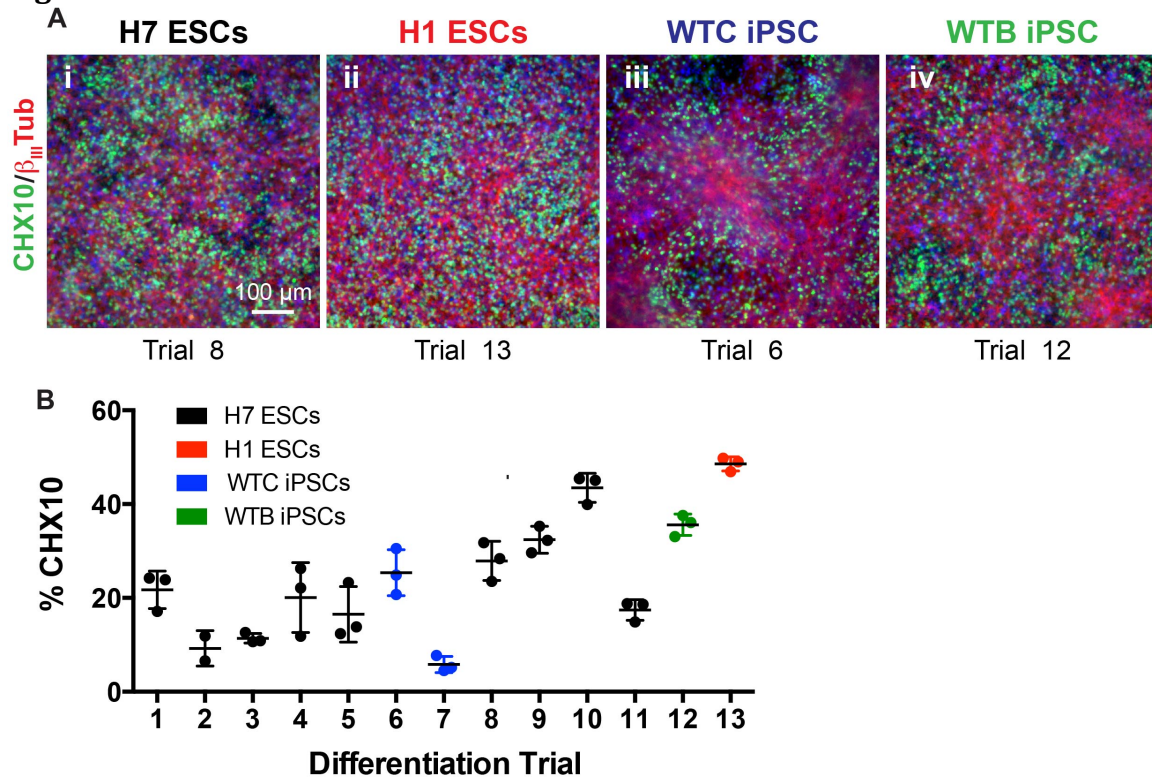

**Fig S2: V2a interneuron differentiation is effective in multiple PCS lines.** (*A<sub>i-iv</sub>*) Immunostaining for CHX10 (green),  $\beta_{III}$  tubulin (red), and labeled nuclei (blue) of hPSCs differentiated using the V2a interneuron protocol. Scale bar is 100 $\mu$ m. (*B*) Percentage of CHX10<sup>+</sup> cells from multiple independent V2a interneuron differentiations in various PSC lines. Data represented as mean  $\pm$  standard deviation.

Figure S3

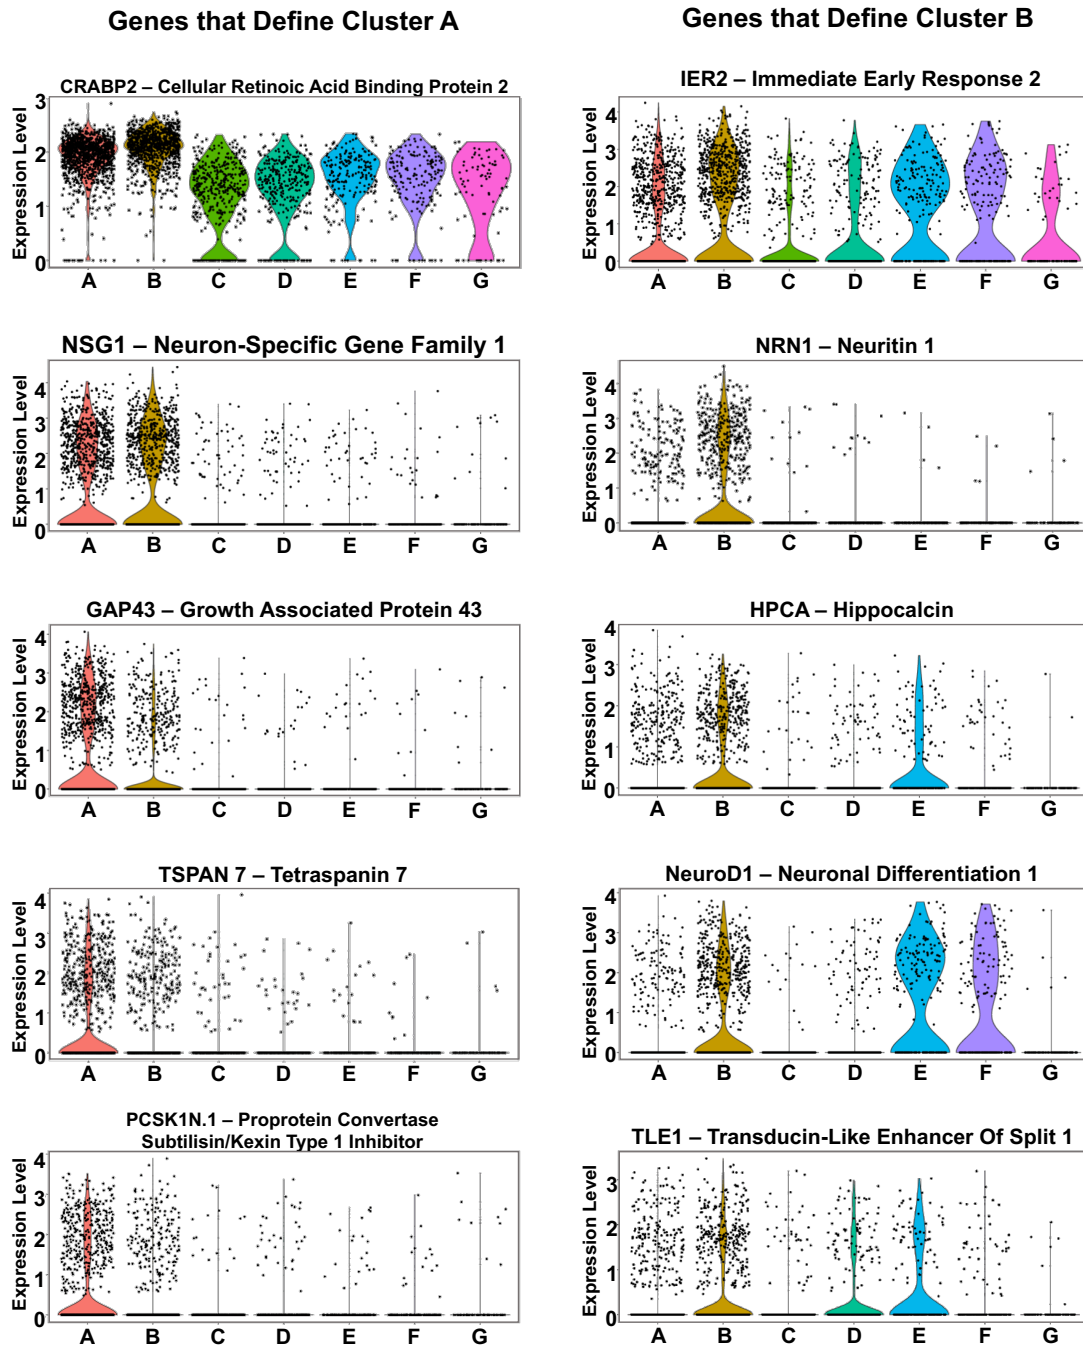

Fig. S3: Select violin plots of genes that identify cluster A and cluster B. Representative genes for cluster A and B chosen from the top 50 differentially expressed genes from the A:B pair-wise comparison.

Figure S4

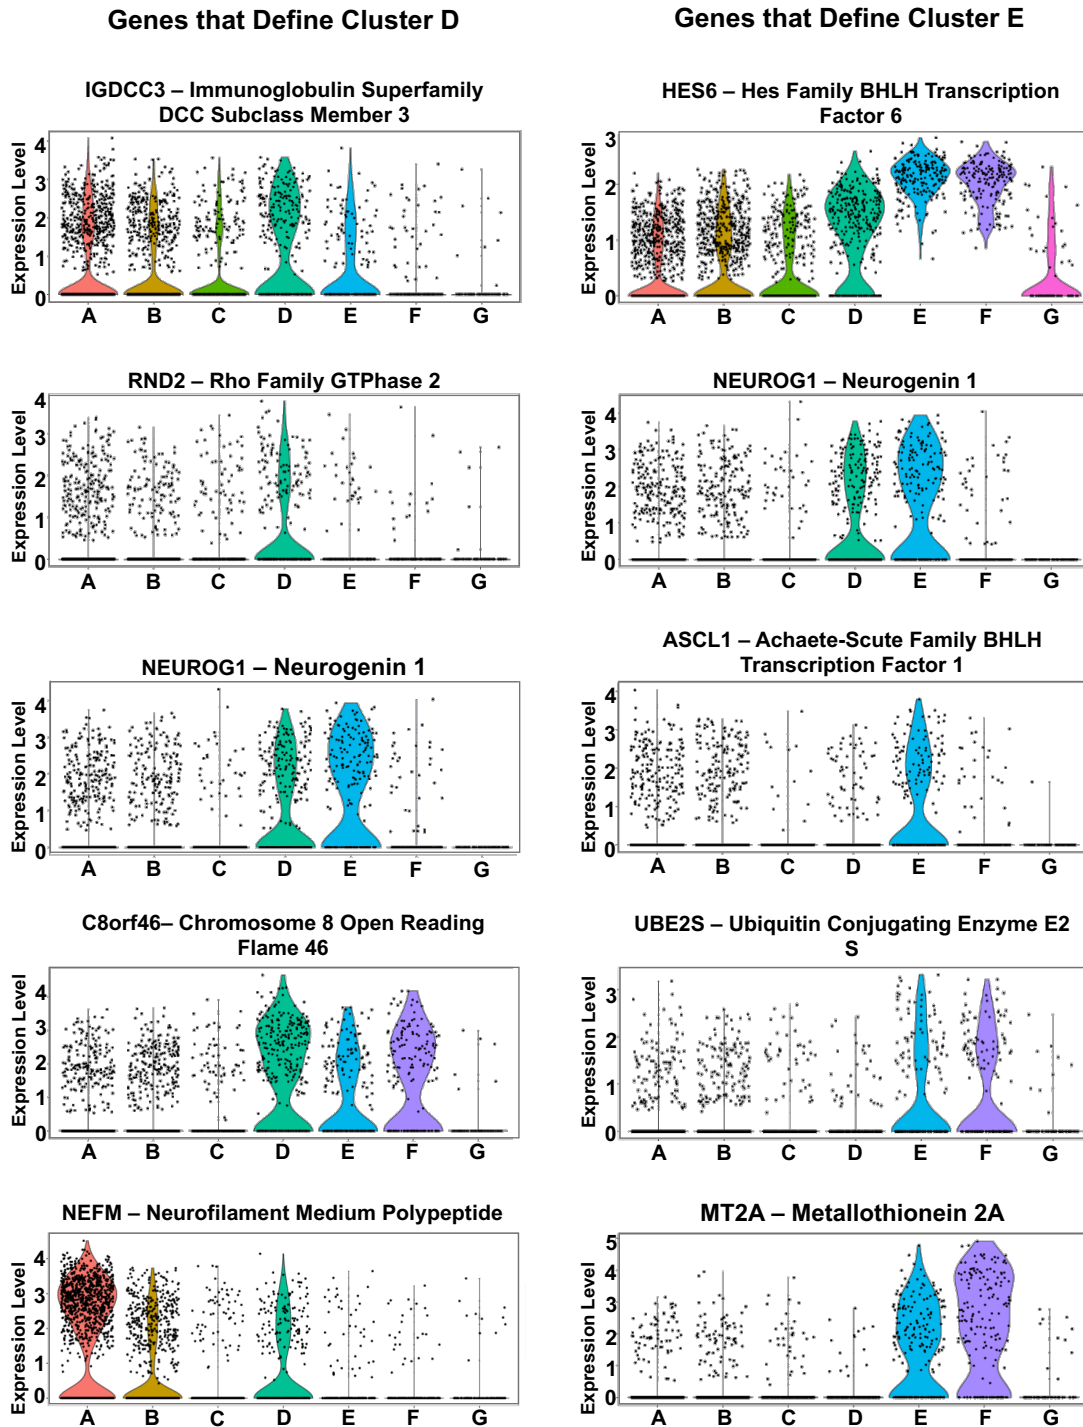

Fig. S4: Select violin plots of genes that identify cluster D and cluster E. Representative genes for cluster D and E chosen from the top 50 differentially expressed genes from the D:B and E:B pair-wise comparison, respectively.

**Figure S5**

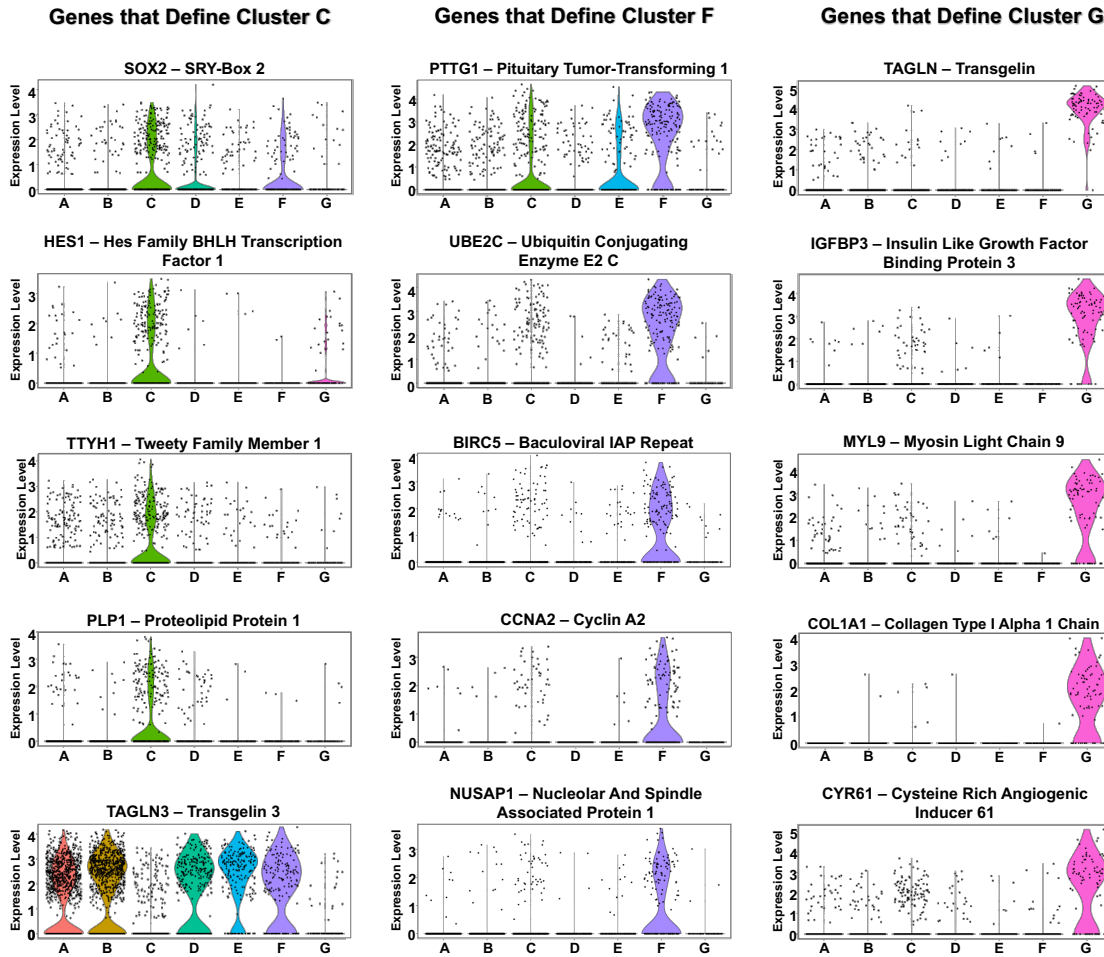

**Fig. S5: Select violin plots of genes that identify cluster C, cluster F and, cluster G. Representative genes for cluster C, F, and G chosen from the top 50 differentially expressed genes from the C:B, F:B, and G:B pair-wise comparison, respectively.**

**Figure S6**

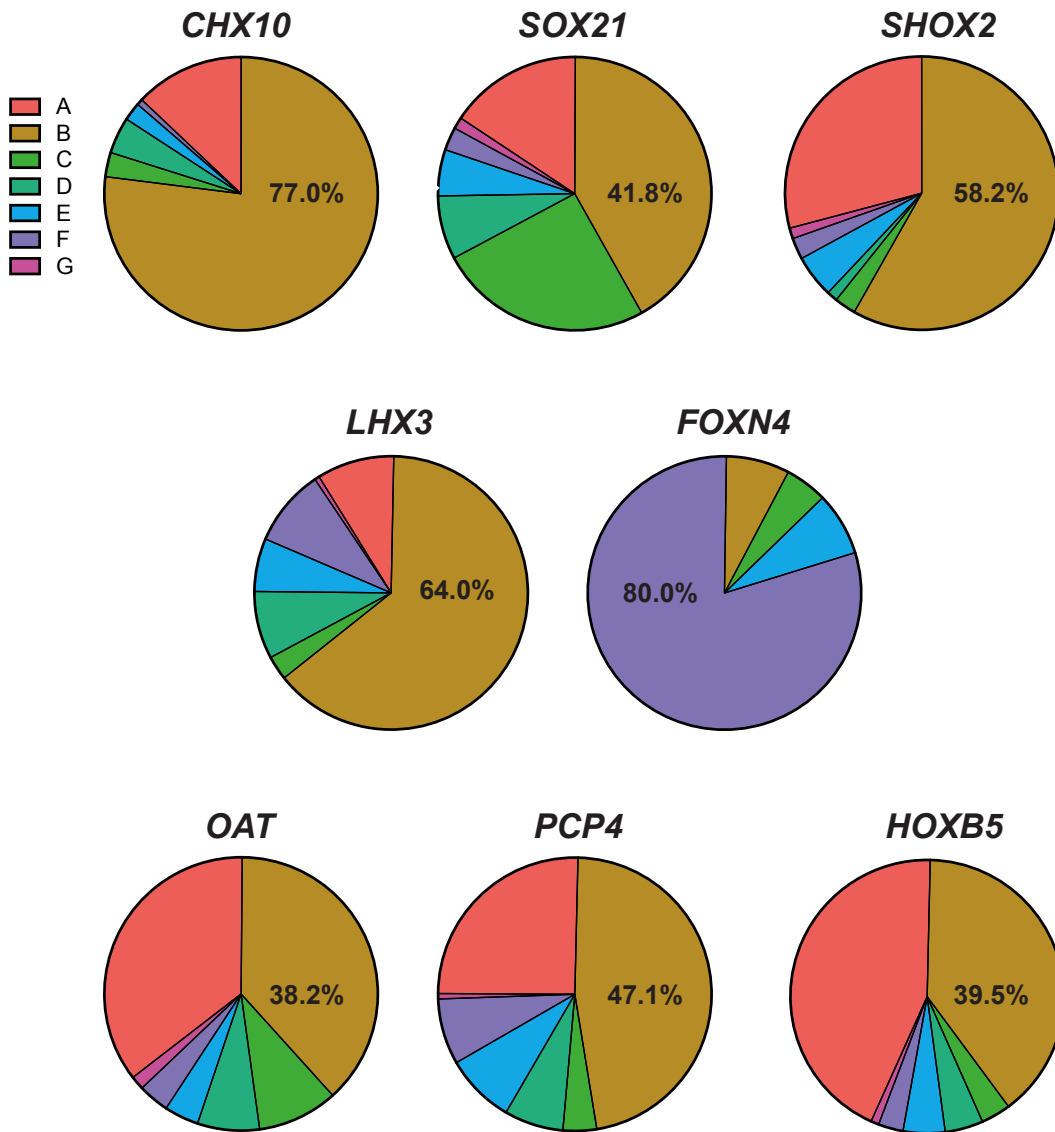

**Fig. S6: Additional V2a interneuron genes and their cluster identity.** Each pie chart reports the number of cells with at least one read for the gene and its cluster identity. The percentage of cells found within cluster B is labeled on the chart for all genes except FOXN4, which labels the percentage of cells found in cluster F.

**Figure S7**

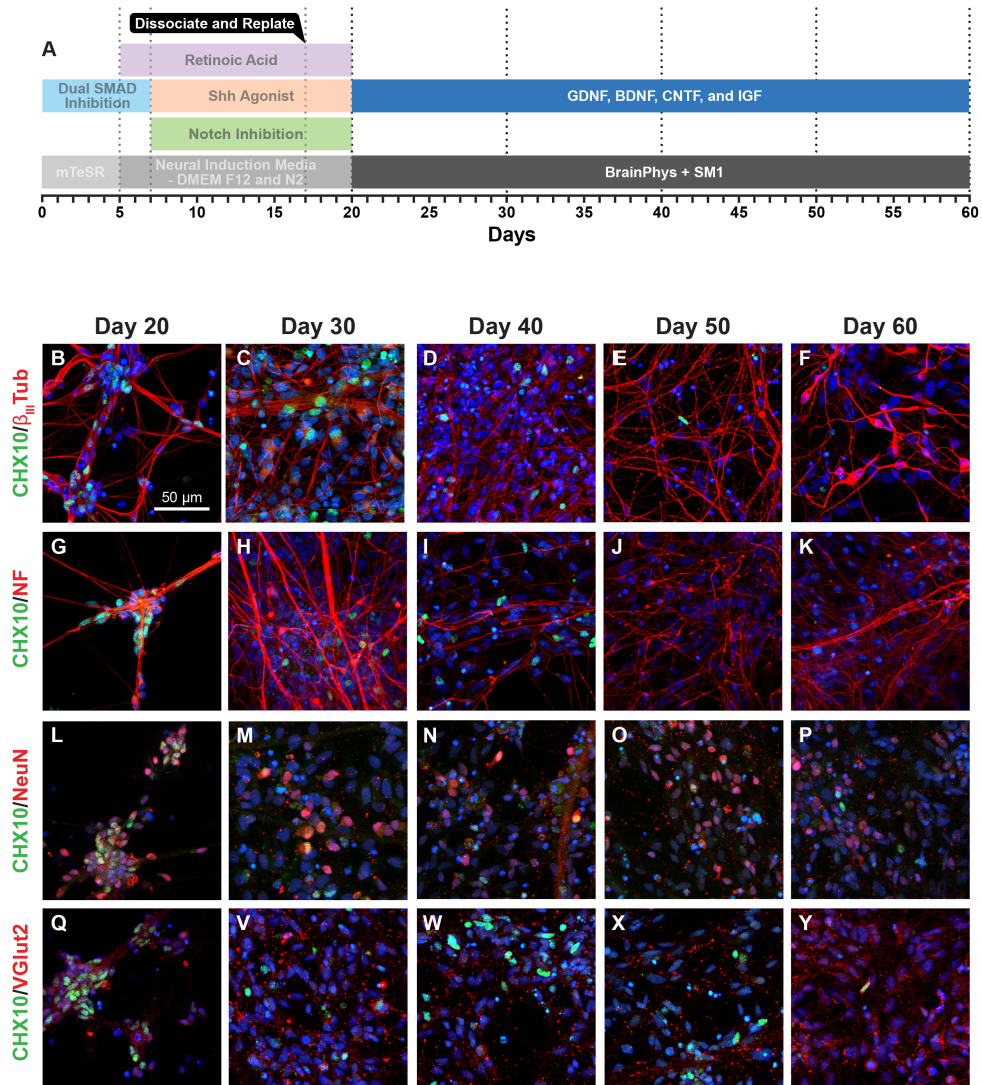

**Fig. S7: V2a interneuron maturation *in vitro*.** (A) Timeline of V2a interneuron maturation cultures. (B-Y) Immunostaining for CHX10 (green) and nuclei labeling (blue) of V2a interneurons on day 20, 30, 40, 50 and 60 of culture. (B-F) Immunostaining for  $\beta_{III}$  tubulin (red). (G-K) Immunostaining for neurofilament (NF, red). (L-P) Immunostaining for NeuN (red). (Q-Y) Immunostaining of vesicular glutamate transporter 2 (VGLUT2, red). Scale bar = 50  $\mu$ m.

Figure S8

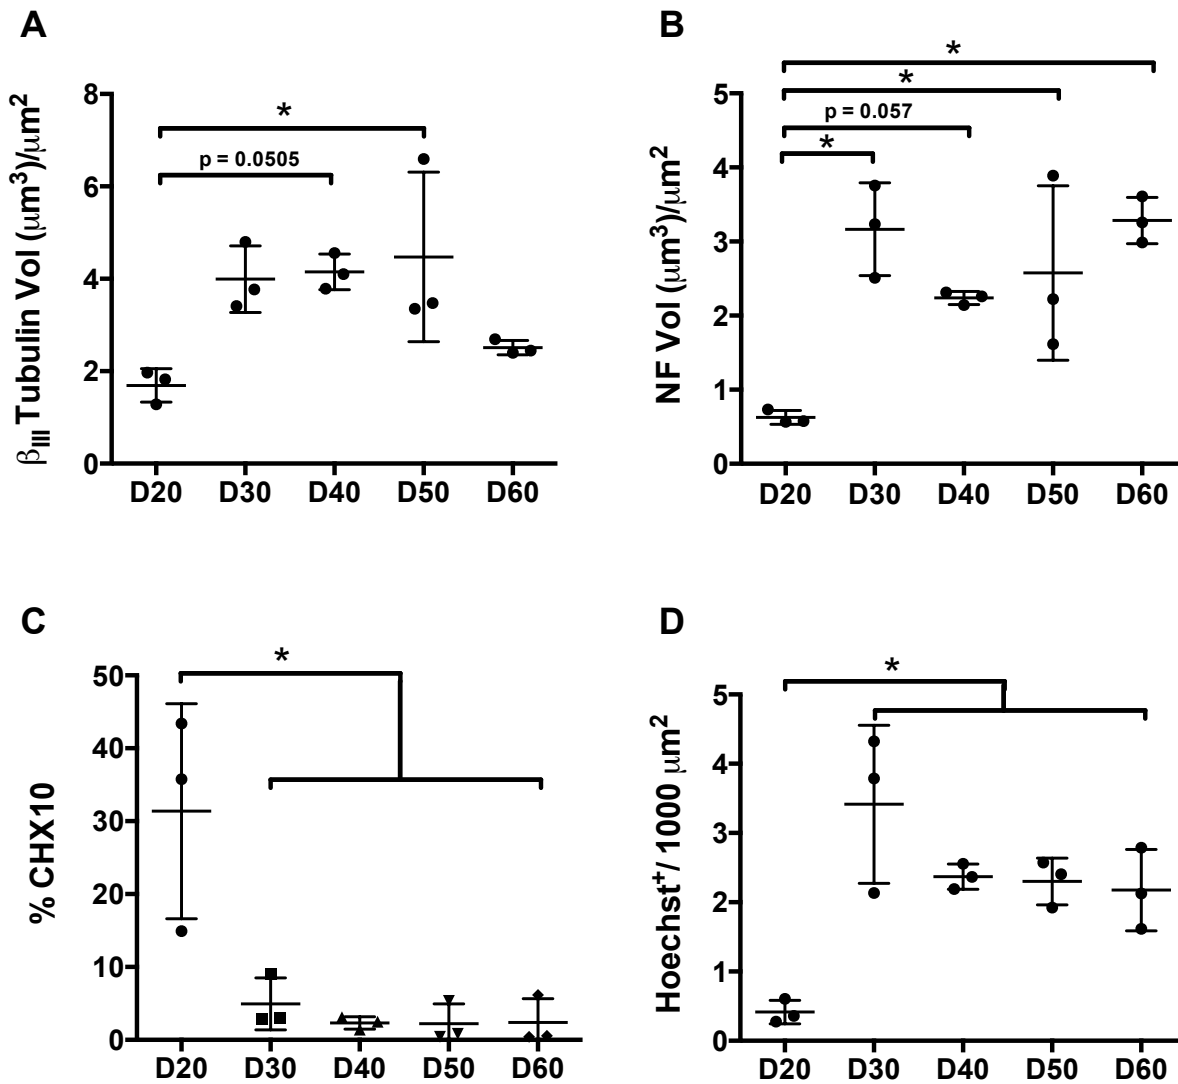

**Fig S8: Quantification of *in vitro* maturation cultures.** (A) Volume of  $\beta_{III}$  tubulin throughout culture duration normalized by observation view area. Day 50 volume was greater than day 20 volume ( $p < 0.05$ , one-way ANOVA and Tukey post hoc comparison) (B) Volume of neurofilament throughout culture duration normalized by observation view area. Day 60, day 50, and day 30 volume was greater than day 20 volume ( $p < 0.05$ , one-way ANOVA and Tukey post hoc comparison) (C) Percent CHX10<sup>+</sup> cells throughout culture duration. Day 20 percentage was greater than all other time points Day 50 volume was greater than day 20 volume ( $p < 0.05$ , one-way ANOVA and Tukey post hoc comparison). (D) Number of Hoechst<sup>+</sup> cells throughout culture duration normalized by observation view area. Day 30 through day 60 were greater than day 20 Day 50 volume was greater than day 20 volume ( $p < 0.05$ , one-way ANOVA and Tukey post hoc comparison).

**Figure S9**

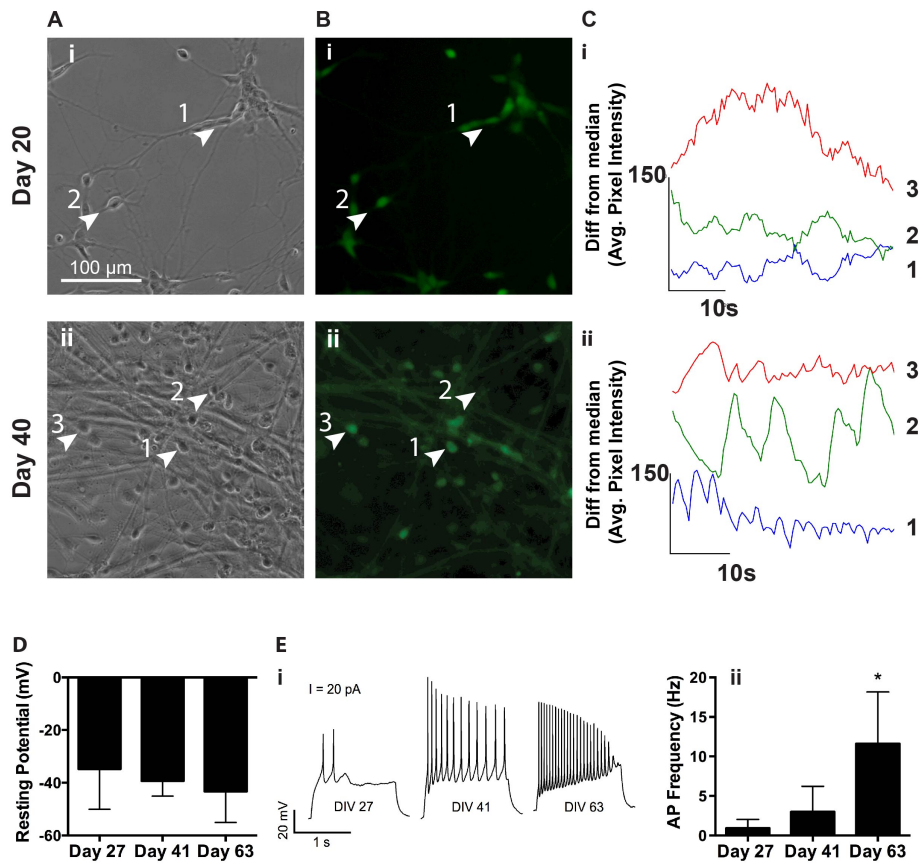

**Fig. S9: Electrophysiological properties show increased maturity with culture duration.** (*A<sub>i-ii</sub>*) Representative phase images of cultures on days 20 and 40. (*B<sub>i-ii</sub>*) Representative fluorescent images of the calcium indicator Fluo4-loaded cells. White arrowheads indicate somas where the regions of interest were selected for calcium imaging. (*C<sub>i-ii</sub>*) Representative traces of fluorescence intensity over time. (*D*) Resting membrane potential of current-clamp patched neurons at Day 27, 41, and 63. (*E<sub>i-ii</sub>*) Representative action potential firing in response to 20 pA current stimulation at Day 27, 41, and 63 (i). Average action potential frequency at Day 27, 41, and 63. Action potential frequency on Day 63 is significantly different ( $p < 0.05$ , one-way ANOVA and Tukey post hoc comparison) than Day 27 and 41 (ii).  $n = 5, 6, \text{ and } 9$  for Day 27, 41, and 63, respectively. Error bars indicate standard error of the mean.



**Figure S10**

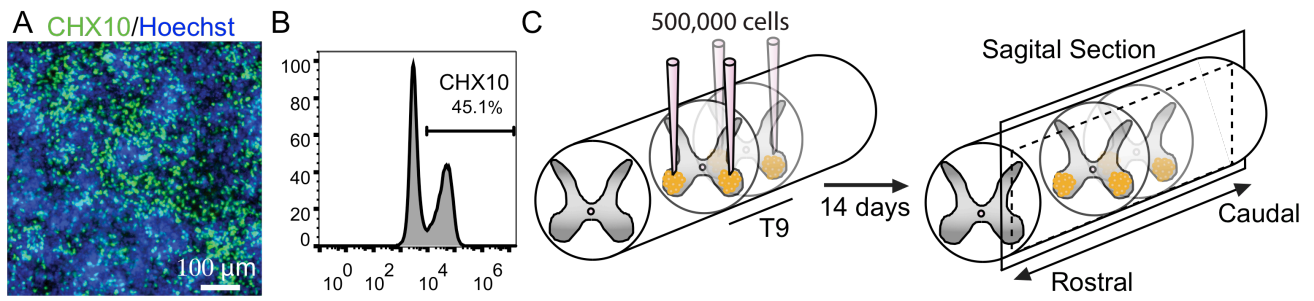

**Fig. S10: Schematic of *in vivo* cell transplantation.** (A) Immunostaining of CHX10 (green) and Hoechst labeling of nuclei (blue) in V2a interneuron cultures on day 17. (B) Flow cytometry analysis of CHX10 in V2a interneuron cultures used for transplantation. (C) Schematic of cell transplantation into the adult murine spinal cord and sectioning of harvested spinal cord tissue at 2 weeks post-transplantation.

**Figure S11**

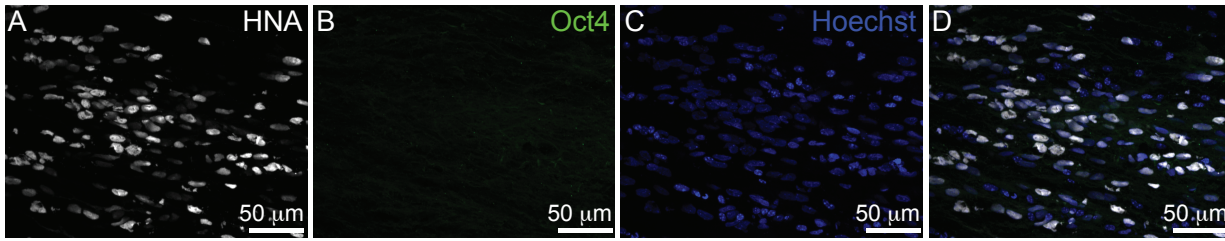

**Fig. S11: Transplanted cells do not express Oct4.** (A-D) Stem121 (white), Oct4 (green), and Hoechst labeled nuclei (blue) immunostaining of transplanted V2a interneurons.

**Figure S12**

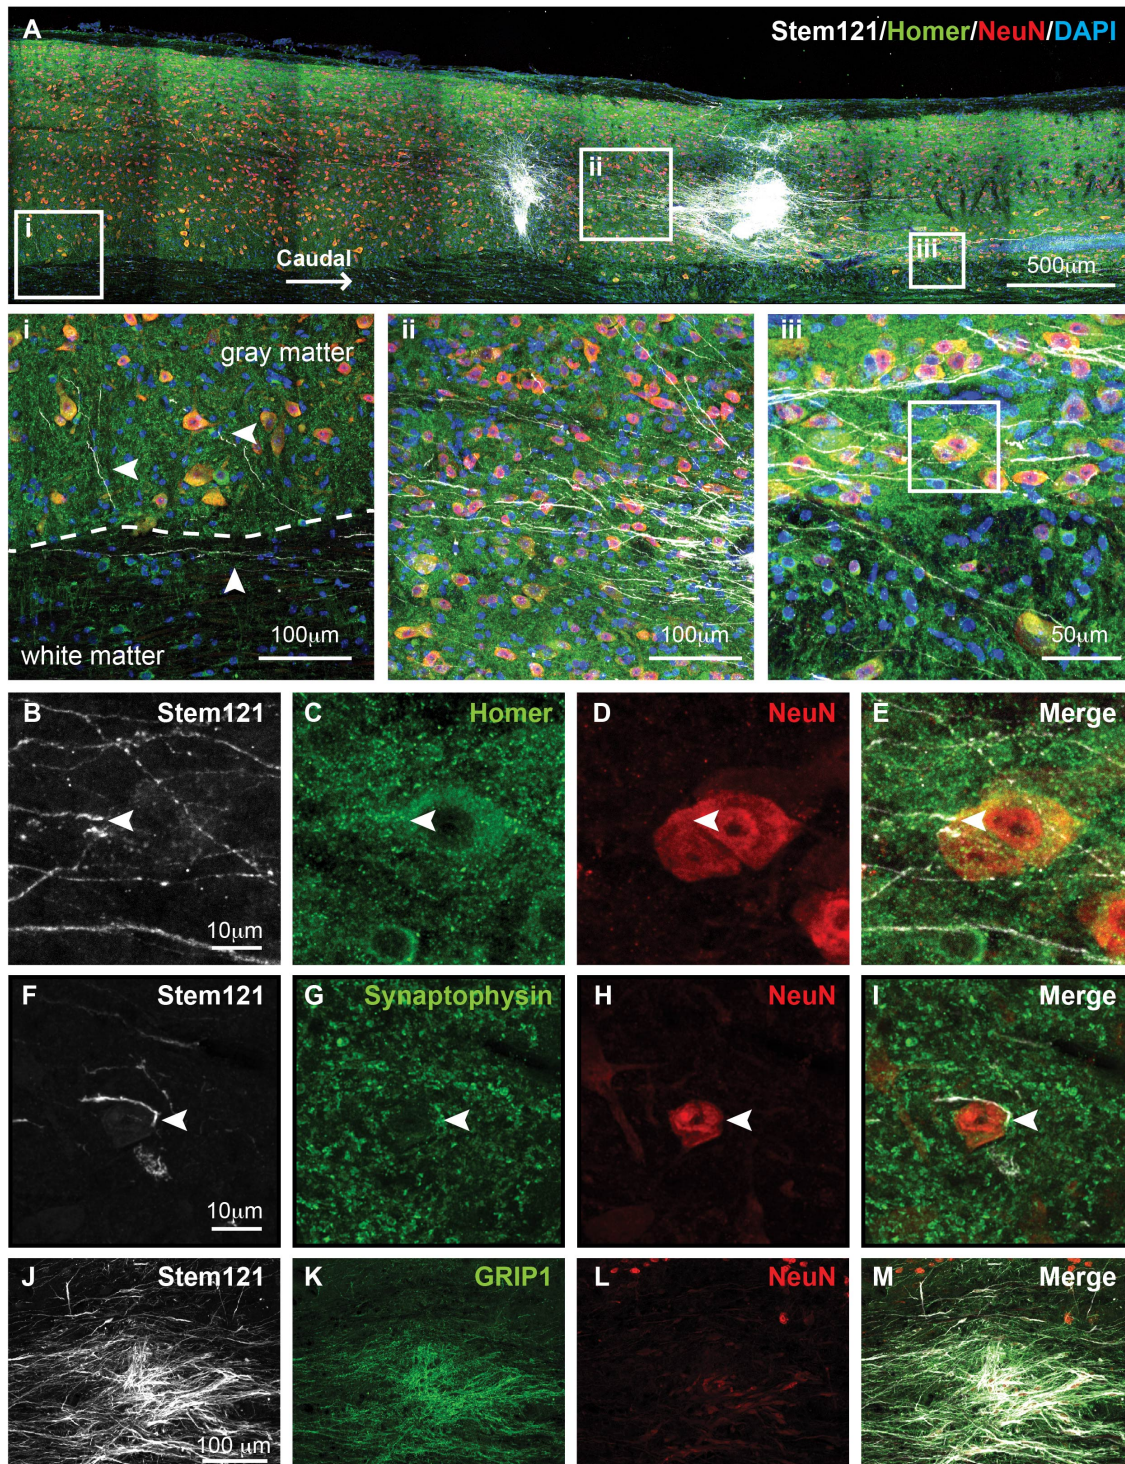

**Fig. S12: Transplanted cells extend projections and form synapses with host neurons**

(A*i-iii*) Stem121 (white), Homer (green) and NeuN (red) immunostaining of transplanted V2a interneurons. (i) Inset of tissue rostral to the transplantation site. Horizontal arrows point to neurites that have extended into the gray matter. Vertical arrows point to neurites that have further extended into the white matter. (ii) Inset of tissue between the two transplantation sites. (iii) Inset of tissue caudal to

the transplantation site. Box highlights the area shown in B-E. (B-E) Stem121 (white), Homer (green) and NeuN (red) immunostaining of transplanted V2a interneurons. Arrows point to colocalization of Stem121, Homer, and NeuN. (F-I) Stem121 (white), synaptophysin (green) and NeuN (red) immunostaining of transplanted V2a interneurons. Arrowheads point to colocalization of Stem121, synaptophysin, and NeuN. (J-M) Stem121 (white), NeuN (red), and GRIP1 (green) immunostaining of transplanted V2a interneurons.

**Table S1: Top differentially expressed genes for each cluster from heatmap**

|           | <b>Cluster A</b> | <b>Cluster B</b> | <b>Cluster C</b> | <b>Cluster D</b> | <b>Cluster E</b> | <b>Cluster F</b> | <b>Cluster G</b> |
|-----------|------------------|------------------|------------------|------------------|------------------|------------------|------------------|
| <b>1</b>  | NEFL             | CRABP2           | VIM              | C8orf46          | HES6             | UBE2C            | TAGLN            |
| <b>2</b>  | NEFM             | NRN1             | FGFBP3           | RGS16            | MT1X             | HMGB2            | IGFBP3           |
| <b>3</b>  | STMN4            | SNCG             | ZFP36L1          | GADD45G          | CKB              | MT2A             | ACTA2            |
| <b>4</b>  | TUBB2B           | STMN2            | HES1             | ARL4D            | VSX1             | HES6             | ANXA1            |
| <b>5</b>  | PMEL             | GNAS             | MGST1            | NEUROG1          | MT2A             | PTTG1            | CTGF             |
| <b>6</b>  | GAP43            | HOXB5            | PLP1             | HES6             | GLRX             | MT1X             | NPPB             |
| <b>7</b>  | RTN1             | PRR24            | DLK1             | TFDP2            | NEUROG1          | BIRC5            | MYL9             |
| <b>8</b>  | MLLT11           | CRABP1           | TTYH1            | GADD45A          | CDH13            | CCNA2            | S100A11          |
| <b>9</b>  | TCEAL7           | NEUROD1          | SOX2             | DLL3             | PPP1R17          | CCNB2            | TPM1             |
| <b>10</b> | GNG3             | NSG1             | ID3              | PSTPIP1          | ASCL1            | NEK2             | IGFBP5           |
| <b>11</b> | RP11-834C11.4    | PCP4             | GPC3             | MFNG             | NEUROD1          | CDC20            | CALD1            |
| <b>12</b> | AP1S2            | HOTAIRM1         | GSN              | PHLDA1           | DOK5             | NUSAP1           | CYR61            |
| <b>13</b> | CLDN5            | ISG15            | GNG5             | PRDX1            | RASD1            | TUBB4B           | HSPB1            |
| <b>14</b> | TSPAN7           | COTL1            | ARL4A            | BTG1             | FAM162A          | PBK              | SPARC            |
| <b>15</b> | UCHL1            | GLRX             | NPC2             | ELAVL4           | B2M              | CDKN3            | ANXA2            |
| <b>16</b> | CPE              | DUSP1            | MAD2L1           | VIM              | STC1             | CCNB1            | TNFRSF12A        |
| <b>17</b> | SCG5             | GNG3             | HMGB2            | RASD1            | DLL3             | CDK1             | MYL12A           |
| <b>18</b> | TM2D3            | DANCR            | SMS              | ARL4A            | PPP1R14C         | CCNA1            | LGALS1           |
| <b>19</b> | HERPUD1          | FOS              | MEST             | SH3BGRL3         | GADD45G          | VSX1             | B2M              |
| <b>20</b> | KLHL35           |                  | PTTG1            | SOX2             | BID              | GPC3             | C8orf4           |

**Table S2: Primers used for quantitative polymerase chain reaction**

| Gene Symbol   | Gene Description                                            | Lineage                         | Alias       | Forward Primer Sequence | Reverse Primer Sequence   |
|---------------|-------------------------------------------------------------|---------------------------------|-------------|-------------------------|---------------------------|
| <i>RPS18</i>  | Ribosomal Protein S18                                       | Ribosomal protein               | <i>18S</i>  | CTTCCACAGGAGGCCTACAC    | CTTCGGCCACACCCTTAAT       |
| <i>CHX10</i>  | Ceh-10 Homeodomain-Containing Homolog                       | V2a interneurons                | <i>VSX2</i> | CGGCGACACAGGACAATCTT    | CCTGTATCCTGTCTCCGGC       |
| <i>FOXP4</i>  | Forkhead Box N4                                             | p2 domain                       |             | CGTACAGCTGTCTGATCGCC    | GGAGCCGCTCATCTTGTCT       |
| <i>GATA3</i>  | GATA Binding Protein 3                                      | V2b interneurons                |             | TTGTGCTCGGAGGGTTTCTT    | CAGCACAGGCTGCAGGAATA      |
| <i>OLIG2</i>  | Oligodendrocyte Lineage Transcription Factor 2              | Progenitor motor neurons        |             | CGCATCCAGATTTTCGGGTC    | AAAAGGTCATCGGGCTCTGG      |
| <i>HB9</i>    | Homeobox Protein HB9                                        | Committed motor neurons         | <i>MX1</i>  | TCTCTTAACGGGAAGGGGCA    | CTAATTCAGGGCGCTCTCGG      |
| <i>PAX6</i>   | Paired Box 6                                                | Early neural                    |             | GAGCGAGCGGTGCATTTG      | TCAGATTCCTATGCTGATTGGTGAT |
| <i>TUBB3</i>  | Beta 3 Class III Tubulin                                    | Immature neurons                |             | GAACCCAGGCAGCTAGAC      | ACTGATGACTTCCCAGAACTGT    |
| <i>POU5F1</i> | POU Class 5 Homeobox 1                                      | Pluripotency                    | <i>OCT4</i> | ATGCATTCAAAGTGGGCTGCT   | AACCTCACCTTCCCTCCAACCA    |
| <i>NES</i>    | Nestin                                                      | Early neural                    |             | CCACCCTGCAAAGGGAATCT    | GGTGAGCTTGGGCACAAAAG      |
| <i>SOX14</i>  | SRY (Sex Determining Region Y)-Box 14                       | V2a interneurons                |             | GAACCCCTTGCACTCCCTACC   | TCGATGTATGGCCGCTTCTC      |
| <i>SIM1</i>   | Single-Minded Family BHLH Transcription Factor 1            | V3 interneurons                 |             | GGCTCTCACCGCAGTATTT     | TGAGCCATTACAGCCCAAGG      |
| <i>RBF3</i>   | Hexaribonucleotide Binding Protein 3 Neuronal Nuclei (NeuN) | Neuronal Nuclei                 |             | ACGATCGTAGAGGGACGGAA    | AATTCAGGCCCGTAGACTGC      |
| <i>NEFL</i>   | Neurofilament (NF) Light Chain                              | Neurons                         |             | CATCAGCGCTATGCAGGACA    | GTCTCCTCGCCTTCCAAGAG      |
| <i>PDGFRA</i> | Platelet-derived growth factor receptor, alpha peptide      | Progenitor oligodendrocyte      |             | CTGGACACTGGGAGATTCCGG   | CACGGCCTCCAATGATCTCT      |
| <i>CSPG4</i>  | Chondroitin Sulfate Proteoglycan 4                          | Progenitor oligodendrocyte      |             | CACTCAGGACGAAGGAACCC    | GGAGCAATACGGTACCCTGG      |
| <i>SOX10</i>  | SRY (Sex Determining Region Y)-Box 10                       | oligodendrocyte precursor       |             | CACAAGAAAGACCACCCGGA    | AAGTGGGCGCTCTGTAGTG       |
| <i>GFAP</i>   | Glial Fibrillary Acidic Protein                             | Astrocytes                      |             | CAGTTATCAGGAGGCGCTGG    | TTTGCCCTCGAATCTGC         |
| <i>THY1</i>   | Thy-1 Cell Surface Antigen                                  | Retina                          |             | TGGATTAAGGATGAGGCCCG    | TGGGGAGGTGCAGTCTGTAT      |
| <i>IRBP</i>   | Interphotoreceptor Retinoid-Binding Protein                 | Retina and photo receptor cells | <i>RBP3</i> | TATCTACAACCGCCCTCCA     | CTGGTGAGGACCACCATC        |
| <i>CRX</i>    | Cone-Rod Homeobox                                           | Retina                          |             | CCTTCTGACAGCTCGGTGTT    | TGGTGTACTCAGCGGTCAC       |

**Table S3: Antibodies used for flow cytometry and immunostaining**

| <b>Antibody Target</b>                         | <b>Species</b> | <b>Vendor</b>                           | <b>Cat. Number</b> | <b>Dilution</b> |
|------------------------------------------------|----------------|-----------------------------------------|--------------------|-----------------|
| CHX10                                          | Mouse          | Santa Cruz Biotechnology                | sc-374151          | 1:1000          |
| CHX10                                          | Sheep          | Abcam                                   | ab16141            | 1:500           |
| $\beta_{III}$ Tubulin                          | Rabbit         | BioLegend                               | MRB-435P           | 1:1000          |
| Vesicular Glutamate<br>Transporter 2 (VGlut 2) | Rabbit         | Synaptic Systems                        | 135 403            | 1:500           |
| Neurofilament (NF)                             | Mouse          | Developmental hybridoma<br>studies bank | 2H3                | 1:20            |
| Neurofilament 200                              | Rabbit         | Sigma-Aldrich                           | N4142              | 1:200           |
| LHX3 (LIM3)                                    | Mouse          | Developmental hybridoma<br>studies bank | 67.4E12            | 1:500           |
| OLIG2                                          | Rabbit         | Millipore (EMD)                         | AB9610             | 1:500           |
| HB9                                            | Mouse          | Developmental hybridoma<br>studies bank | 81.5C10            | 1:20            |
| Stem 121                                       | Mouse          | Clontech                                | Y40410             | 1:500           |
| Human Nuclear Antigen                          | Mouse          | Millipore (EMD)                         | MAB1281            | 1:200           |
| GRP1                                           | Rabbit         | Abcam                                   | ab25963            | 1:200           |
| GABA                                           | Rabbit         | Sigma-Aldrich                           | A2052              | 1:2000          |
| NeuN                                           | Chicken        | Millipore (EMD)                         | abN91              | 1:500           |
| Oct-3/4                                        | Goat           | Santa Cruz Biotechnology                | sc-8629            | 1:100           |
| Ms isotype                                     | Mouse          | R&D Systems                             | MAB002             |                 |
| NeuN                                           | Rabbit         | Millipore (EMD)                         | ABN91              | 1:1000          |
| Synaptophysin                                  | Rabbit         | Synaptic Systems                        | 101 002            | 1:200           |
| HOMER                                          | Rabbit         | GeneTex                                 | GTX103278          | 1:100           |

## Supporting References

1. Bardy C, *et al.* (2016) Predicting the functional states of human iPSC-derived neurons with single-cell RNA-seq and electrophysiology. *Mol Psychiatry* 21(11):1573-1588.
2. Livak KJ & Schmittgen TD (2001) Analysis of relative gene expression data using real-time quantitative PCR and the 2(-Delta Delta C(T)) Method. *Methods* 25(4):402-408.
3. Dobin A, *et al.* (2013) STAR: ultrafast universal RNA-seq aligner. *Bioinformatics* 29(1):15-21.
4. Macosko EZ, *et al.* (2015) Highly Parallel Genome-wide Expression Profiling of Individual Cells Using Nanoliter Droplets. *Cell* 161(5):1202-1214.
5. Satija R, Farrell JA, Gennert D, Schier AF, & Regev A (2015) Spatial reconstruction of single-cell gene expression data. *Nat Biotechnol* 33(5):495-502.
6. van der Maaten LJP HG (2008) Visualizing High-Dimensional Data Using t-SNE. *Journal of Machine Learning Research* 9:2579-2605.
7. Ashburner M, *et al.* (2000) Gene ontology: tool for the unification of biology. The Gene Ontology Consortium. *Nat Genet* 25(1):25-29.
8. Gene Ontology C (2015) Gene Ontology Consortium: going forward. *Nucleic Acids Res* 43(Database issue):D1049-1056.
9. Eden E, Lipson D, Yogev S, & Yakhini Z (2007) Discovering motifs in ranked lists of DNA sequences. *PLoS Comput Biol* 3(3):e39.
10. Eden E, Navon R, Steinfeld I, Lipson D, & Yakhini Z (2009) GOrilla: a tool for discovery and visualization of enriched GO terms in ranked gene lists. *BMC Bioinformatics* 10:48.
